# Supplementary material for: Eviction Moratoria Expiration and COVID-19 Infection Risk Across Strata of Health and Socioeconomic Status in the United States
Source: PubMed Central journal article supplement (PMC8406080; doi:10.1001/jamanetworkopen.2021.29041), 2021-08-30
Supplement: jamanetwopen-e2129041-s001.pdf [file jamanetwopen-e2129041-s001.pdf]

## Supplemental Online Content

Sandoval-Olascoaga S, Venkataramani AS, Arcaya MC. Eviction moratoria expiration and COVID-19 infection risk across strata of health and socioeconomic status in the United States. *JAMA Netw Open*. 2021;4(8):e2129041. doi:10.1001/jamanetworkopen.2021.29041

- eFigure 1.** Trends in Share of Individuals Exposed to Treatment by the Week of the Year
- eFigure 2.** Survival Curves on the Association Between Lifting the Eviction Moratorium and COVID-19
- eFigure 3.** Event Study Estimates of the Association Between Lifting the Eviction Moratorium and COVID-19, Stratified by Poverty and Rent-Burdenship Rate
- eFigure 4.** Event Study Estimates of the Association Between Lifting the Eviction Moratorium and COVID-19, by Sample Design
- eFigure 5.** Event Study Estimates of the Association Between Lifting the Eviction Moratorium and COVID-19, Stratified by Charlson Comorbidity Index and Sample Design
- eFigure 6.** Event Study Estimates of the Association Between Lifting the Eviction Moratorium and COVID-19, Stratified by Poverty and Rent-Burdenship Rate and Sample Design
- eFigure 7.** Event Study Estimates of the Association Between Lifting the Eviction Moratorium and Changing Zip Code Address
- eFigure 8.** Event Study Estimates of the Association Between Lifting the Eviction Moratorium and COVID-19, With and Without Z Codes
- eMethods 1.** Event-Time Study Model Specification
- eMethods 2.** Survival Curves
- eReferences.**

This supplemental material has been provided by the authors to give readers additional information about their work.

**eFigure 1 Trends in Share of Individuals Exposed to Treatment by the Week of the Year**  
*Percentage*

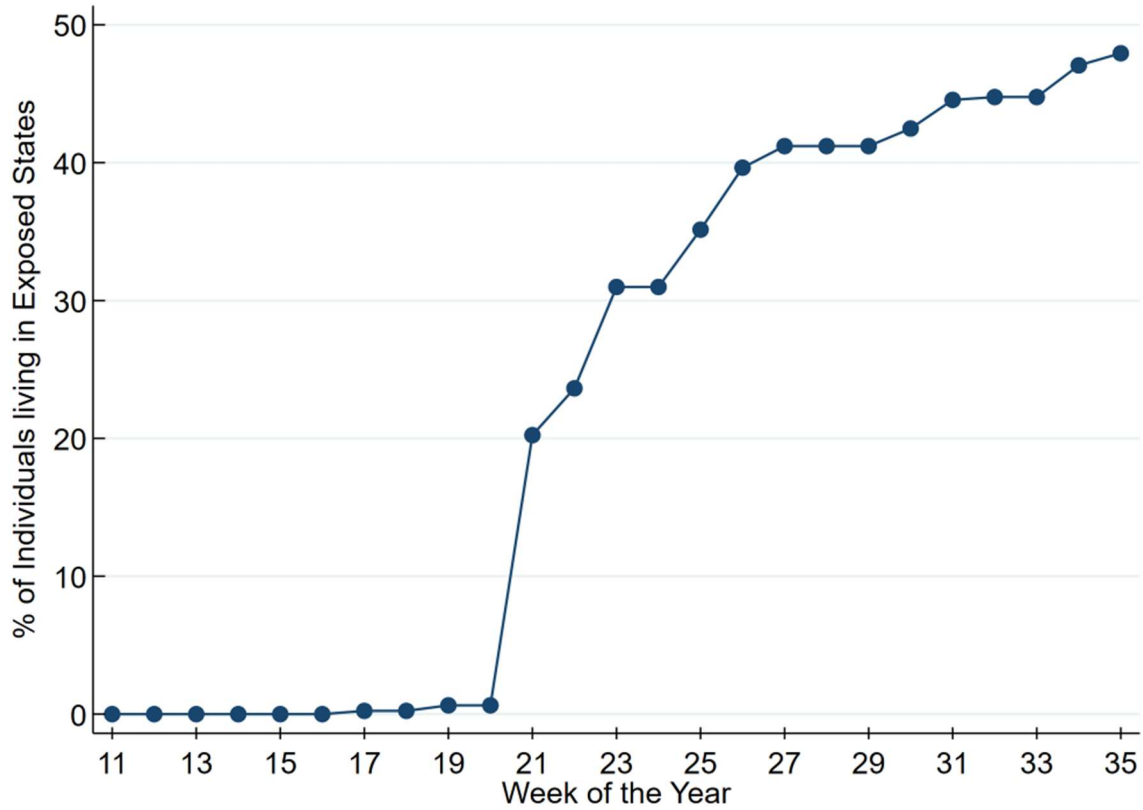

**Notes:** Trends in the percentage of individuals in the study sample exposed to treatment. Estimates come from the balanced sample. The y-axis shows the cumulative percentage of individuals in the study sample who lived in a state that lifted their eviction moratorium during the study period. At the beginning of the study in week 11 of 2020, no individuals were exposed to a state lifting their eviction moratorium. By the end of the study period, week 35 of 2020, 244,335 individuals lived in a state that lifted their eviction moratorium.

**eFigure 2. Survival Curves on the Association Between Lifting the Eviction Moratorium and COVID-19**  
*Survival Probability*

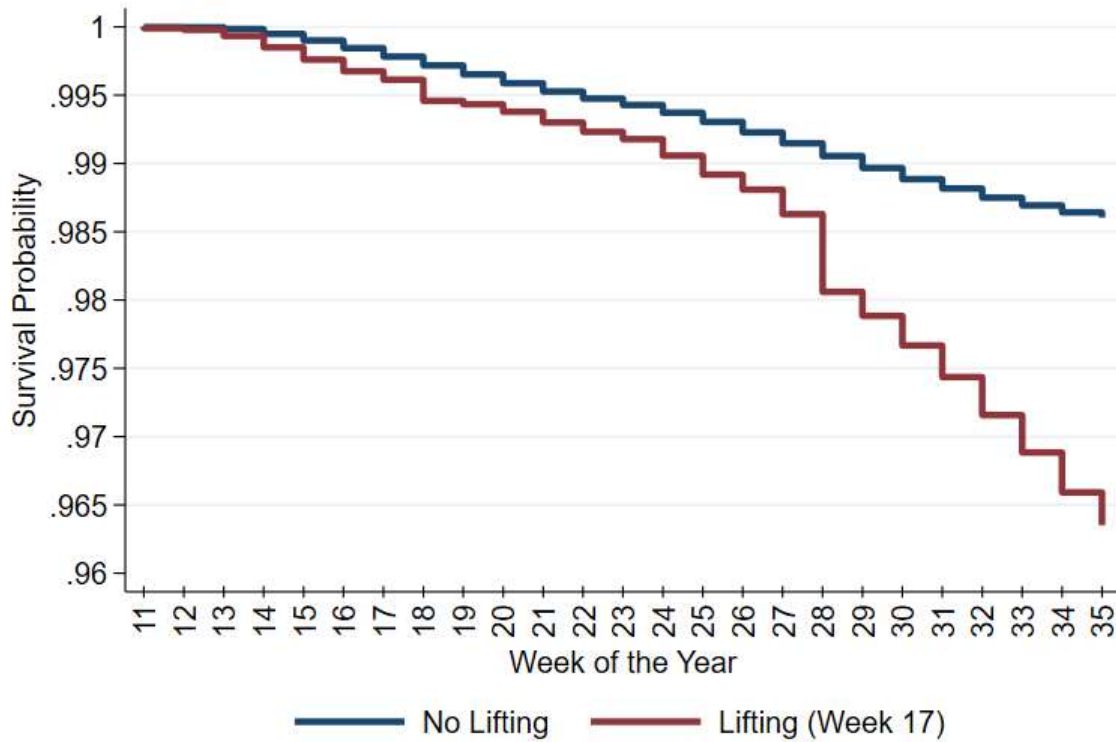

Note: Survival probability refers to the probability of remaining in the study with no diagnosis of COVID-19.

| <b>Scenario</b> | <b>Week 11</b> | <b>Week 15</b> | <b>Week 19</b> | <b>Week 23</b> | <b>Week 27</b> | <b>Week 31</b> | <b>Week 35</b> |
|-----------------|----------------|----------------|----------------|----------------|----------------|----------------|----------------|
| No Lifting      | 463,520        | 463,277        | 462,210        | 461,086        | 459,940        | 458,351        | 457,051        |
| Lifting (17)    | 463,520        | 462,824        | 461,005        | 459,960        | 457,997        | 452,705        | 446,612        |

**eFigure 3. Event Study Estimates of the Association Between Lifting the Eviction Moratorium and COVID-19, Stratified by Poverty and Rent-Burdenship Rate**  
*Hazard Ratios*

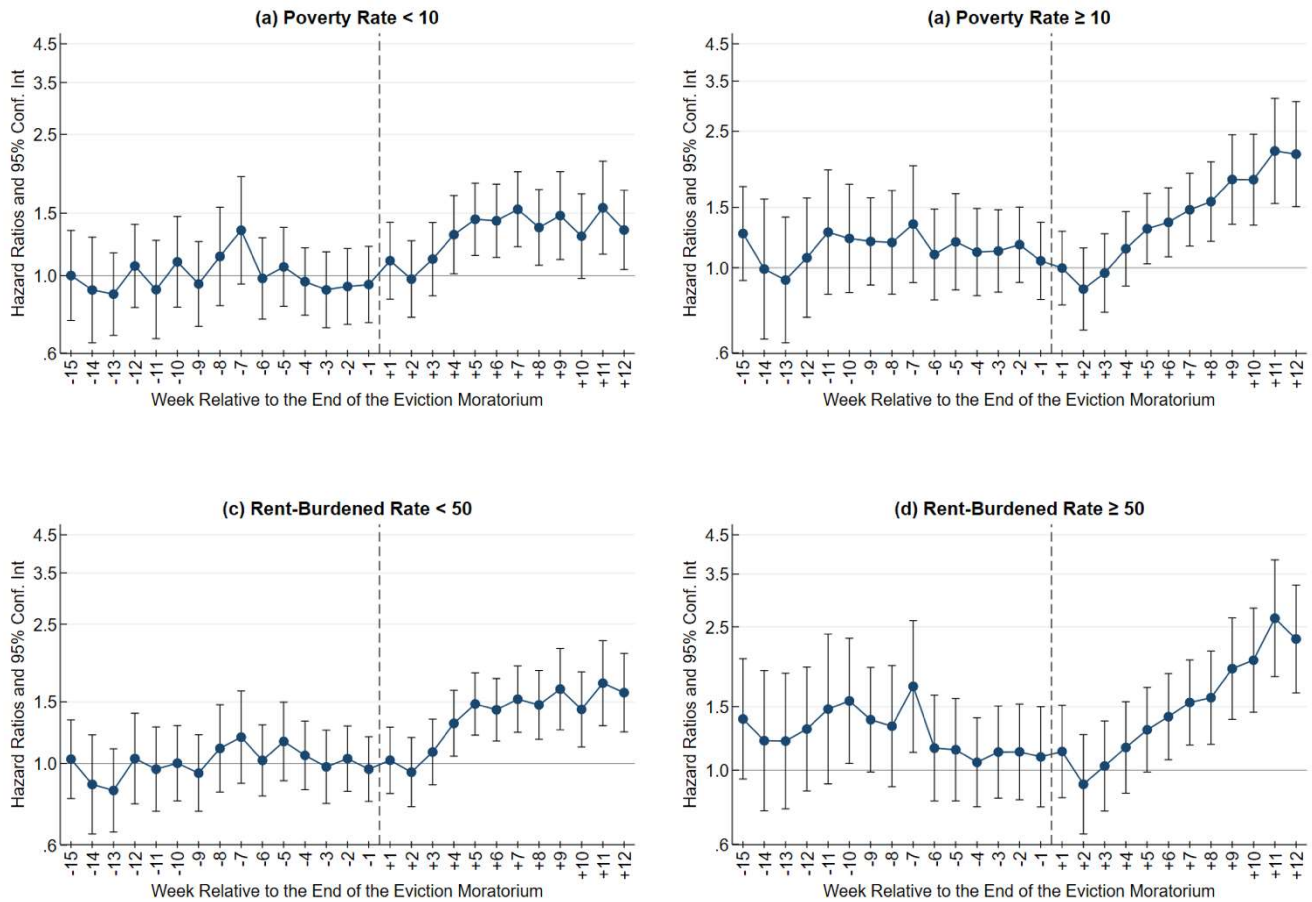

**Note:** Estimates come from the balanced sample. Y-axis is in log scale. The vertical dashed line represents the end of the eviction moratorium. X-axis represents the number of weeks relative to the end of the eviction moratorium. Hazard Ratios and 95% Confidence Interval from models to those estimated in Equation 1/Supplement.

**eFigure 4. Event Study Estimates of the Association Between Lifting the Eviction Moratorium and COVID-19, by Sample Design**  
*Hazard Ratios*

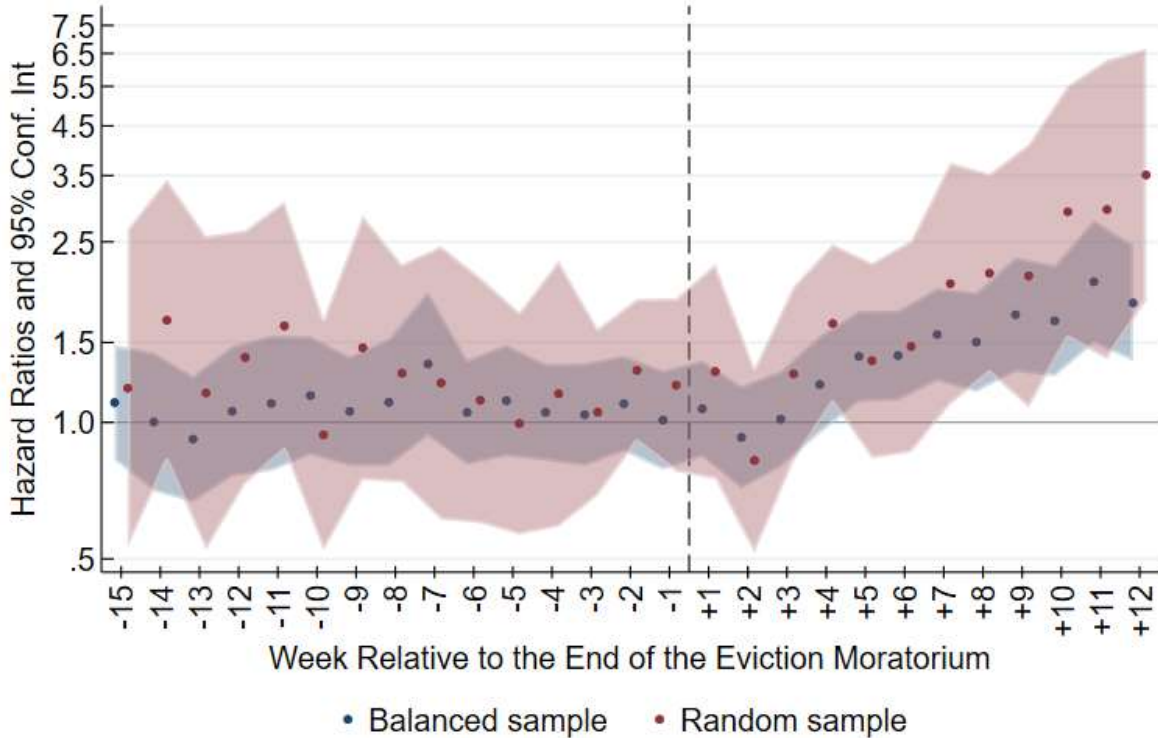

**Note:** Y-axis is in log scale. The vertical dashed line represents the end of the eviction moratorium. X-axis represents the number of weeks relative to the end of the eviction moratorium. Hazard Ratios and 95% Confidence Interval from models to those estimated in Equation 1/Supplement. We used, in separate models, both the balanced sample (in blue) and the 2% random sample (in red) to conduct this analysis.

**eFigure 5. Event Study Estimates of the Association Between Lifting the Eviction Moratorium and COVID-19, Stratified by Charlson Comorbidity Index and Sample Design**  
*Hazard Ratios*

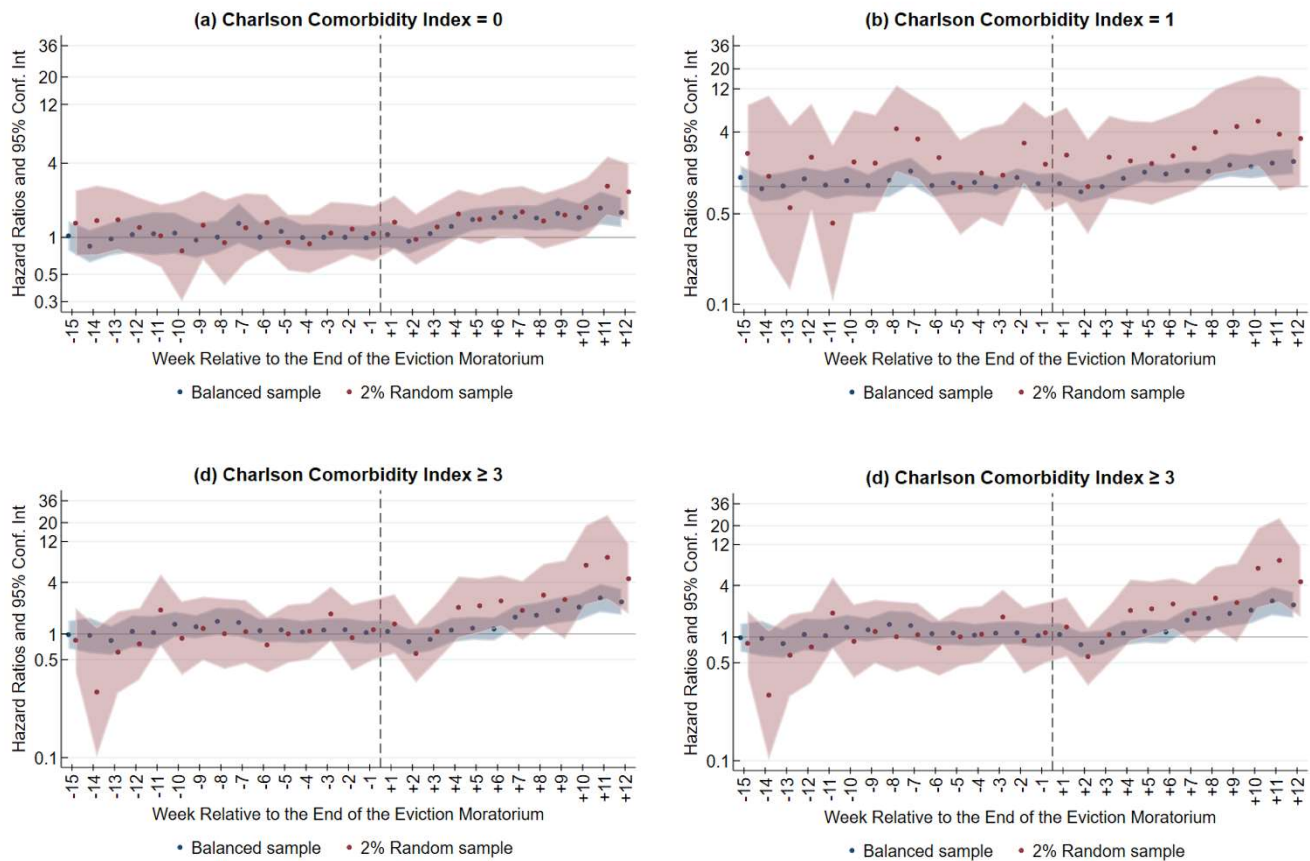

**Note:** Y-axis is in log scale. The vertical dashed line represents the end of the eviction moratorium. X -axis represents the number of weeks relative to the end of the eviction moratorium. Hazard Ratios and 95% Confidence Interval from models to those estimated in Equation 1/Supplement. We used, in separate models, both the balanced sample (in blue) and the 2% random sample (in red) to conduct this analysis.

**Figure 6. Event Study Estimates of the Association Between Lifting the Eviction Moratorium and COVID-19, Stratified by Poverty and Rent-Burdenship Rate and Sample Design**  
*Hazard Ratios*

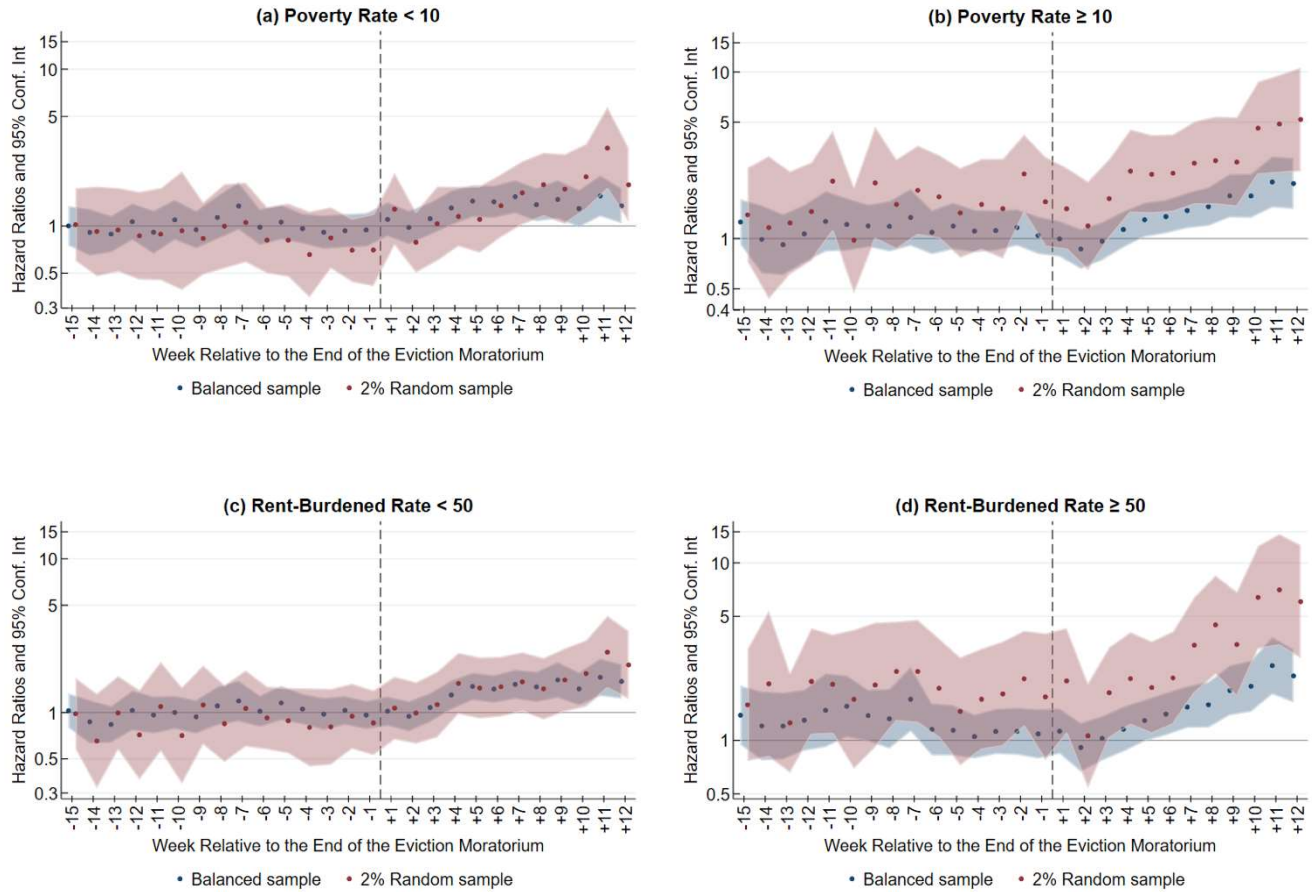

**Note:** Y-axis is in log scale. The vertical dashed line represents the end of the eviction moratorium. X-axis represents the number of weeks relative to the end of the eviction moratorium. Hazard Ratios and 95% Confidence Interval from models to those estimated in Equation 1/Supplement. We used, in separate models, both the balanced sample (in blue) and the 2% random sample (in red) to conduct this analysis.

**eFigure 7. Event Study Estimates of the Association Between Lifting the Eviction Moratorium and Changing Zip Code Address**  
*Hazard Ratios*

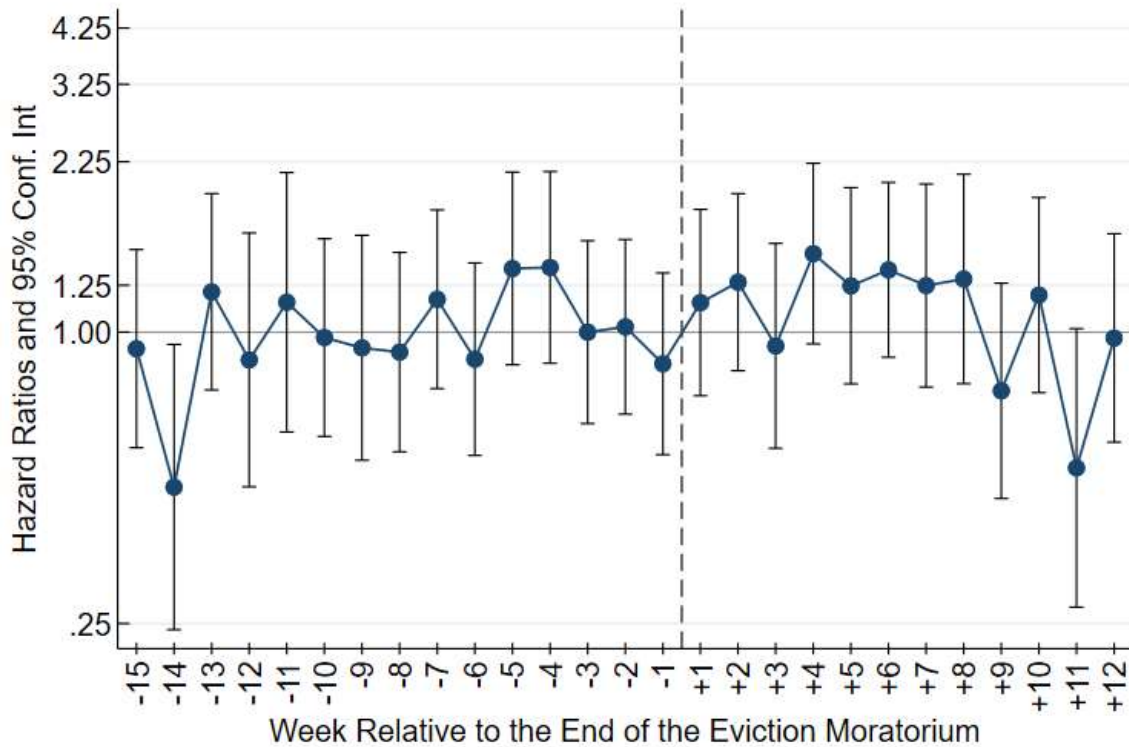

**Note:** Estimates come from the balanced sample. Y-axis is in log scale. The vertical dashed line represents the end of the eviction moratorium. X-axis represents the number of weeks relative to the end of the eviction moratorium. Hazard Ratios and 95% Confidence Interval from models to those estimated in Equation 1/Supplement except here the main outcome is a binary variable indicating whether the individual requested a change of residential zip code.



**eFigure 8. Event Study Estimates of the Association Between Lifting the Eviction Moratorium and COVID-19, With and Without Z Codes**  
*Hazard Ratios*

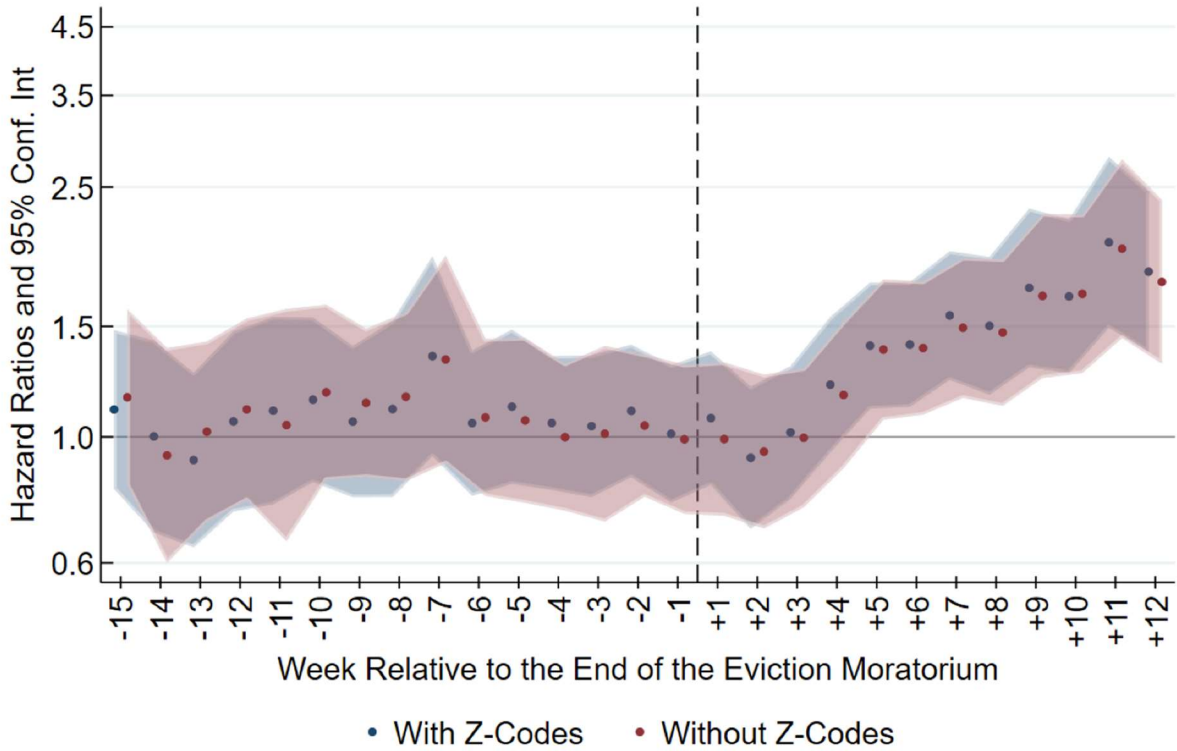

**Note:** Y-axis is in log scale. The vertical dashed line represents the end of the eviction moratorium. X-axis represents the number of weeks relative to the end of the eviction moratorium. Hazard Ratios and 95% Confidence Interval from models to those estimated in Equation 1/Supplement. We used, in separate models of our main specification, both with z-codes (in blue) and without z-codes (in red) to conduct this analysis.

## eMethods 1. Event-Time Study Model Specification

To study the association between lifting the eviction moratorium on the hazard of being diagnosed with COVID-19 in a given week, we use a Cox regression model with time-dependent covariates in an event-time type specification.<sup>11,12</sup> This approach models the weekly probability of being diagnosed with COVID-19 at a given period conditional on having been observed without a positive diagnosis previously, where the treatment is defined as lifting the eviction moratorium, and treated individuals are compared to individuals living in states that had not yet lifted their moratoria.

This study uses the time from when individuals enter the study until either a COVID-19 diagnosis or time censoring at the end of the study period, just like in a classic Cox analysis. Unlike a standard Cox model, however, we also make use of information on time since the treatment occurred (i.e., lifting an eviction moratorium) for the treated. This methodology allows us to understand whether the association between expiring eviction moratoria and a COVID-19 diagnosis changes over time, which is useful when studying events that develop exponentially, such as epidemics, while also relaxing the proportional hazards assumption.

Specifically, we fitted the following model:

$$\lambda(t_{imt} | \mathbf{Z}(t)) = \lambda_0(t) \exp \left\{ \sum_{k=-15}^{12} \beta_k (D_{mk} \cdot T_m) + \boldsymbol{\gamma} \mathbf{X}_{imt} + \boldsymbol{\psi} M_{im} + S_m + \delta_t + \mathbf{u}_{imt} \right\} \dots \quad (1)$$

The dependent variable  $\lambda(t_{imt} | \mathbf{Z}(t))$  denotes the probability that an individual,  $i$ , living in state,  $m$ , during week  $t$  is diagnosed with COVID-19.  $T_m$  is a binary variable for the treatment group, i.e., those states that implemented an eviction moratorium but lifted it.  $D_{mk}$  is a binary variable that equals 1 for those treated states during week,  $k$ , relative to the week when the state lifted their moratorium. The exposure variable is bottom coded before week 15 and top coded after week 12, implying that dynamics wear off after these points. This decision follows prior literature<sup>11,21</sup> to avoid difficulties when interpreting results due to sample size imbalances created by differences in the timing of lifting the moratoriums.  $\mathbf{X}_{imt}$  is a vector of time-varying covariates (i.e., non-pharmaceutical interventions, and COVID-19 cases and tests), while  $M_{im}$  is a vector of time-invariant covariates (i.e., sex, age, type of insurance, work-industry, CCI, and z-codes diagnoses).  $S_m$  are state fixed effects that adjust for potential confounding from time-invariant state-level factors or baseline differences in socioeconomic characteristics, while  $\delta_t$  are weekly fixed effects that adjust for nationwide secular trends in the outcome.  $\mathbf{u}_{imt}$  is a vector of residuals. Standard errors are clustered at the state and week-level. We used the Breslow method for ties.

The coefficients of interest are captured by,  $\beta_k$ , showing the difference in outcomes for leads and lags of lifting the eviction moratoria relative to a reference week (i.e., the week a state lifted their moratorium) and relative to all states that did not lift their eviction moratorium during the reference period.

The causal identifying assumption is that COVID-19 diagnosis risk in exposed states would have continued along the same trajectories in the absence of exposure.<sup>11</sup> We cannot directly

test this assumption. Still, potential violations can be probed by examining outcome trends for event weeks before lifting the eviction moratorium. We formally test this through a joint significance chi-square test simultaneously of all the terms before the eviction moratorium was lifted.

## eMethods 2. Survival Curves

To investigate temporal trends between the association of lifting an eviction moratorium and COVID-19, we fit survival curves to the data, estimating the hazard of being diagnosed with COVID-19 at time,  $t$ , for total times,  $T$ .<sup>15</sup> Using the time-varying outcome variable,  $C_t$ , we defined survival at  $t$  as  $\Pr [C_t = 0]$ , while the hazard at  $t$  is defined as  $\Pr [C_t = 1 | C_{t-1} = 0]$ . This, the survival probability at  $t$  is the product of the conditional probabilities of having survived each interval between 0 and  $t$ :<sup>1</sup>

$$\Pr [C_t = 0] = \prod_{m=1}^t \Pr [C_m = 0 | C_{m-1} = 0]$$

We estimated the hazards parametrically by fitting a logistic regression model for  $\Pr [C_{t+1} = 1 | C_t = 0]$  that, at each,  $t$ , as:

$$\vartheta_{0,t} + \sum_{k=-15}^{12} \vartheta_k(D_{mk} \cdot T_m) + \vartheta_2 \sum_{k=-15}^{12} \vartheta_k(D_{mk} \cdot T_m) \cdot t + \vartheta_3 \sum_{k=-15}^{12} \vartheta_k(D_{mk} \cdot T_m) \cdot t^2 + \boldsymbol{\gamma} \mathbf{X}_{imt} + \boldsymbol{\Psi} \mathbf{M}_{im} + S_m + \mathbf{u}_{imt} \dots \quad (2)$$

Where,  $\vartheta_{0,t}$ , is a flexible time-varying function  $\vartheta_{0,t} = \vartheta_0 + \vartheta_4 t + \vartheta_5 t^2$ .

As in the previous analysis,  $T_m$  is a binary variable for the treatment group, i.e., those states that implemented an eviction moratorium but lifted it.  $D_{mk}$  is a binary variable that equals 1 for those treated states during week,  $k$ , relative to the week when the state lifted their moratorium. The exposure variable is bottom coded before week 15 and top coded after week 12, implying that dynamics wear off after these points. This decision follows prior literature<sup>11,21</sup> to avoid difficulties when interpreting results due to sample size imbalances created by differences in the timing of lifting the moratoriums.  $\mathbf{X}_{imt}$  is a vector of time-varying covariates (i.e., non-pharmaceutical interventions, and COVID-19 cases and tests), while  $\mathbf{M}_{im}$  is a vector of time-invariant covariates (i.e., sex, age, type of insurance, work-industry, CCI, and z-codes diagnoses).  $S_m$  are state fixed effects that adjust for potential confounding from time-invariant state-level factors or baseline differences in socioeconomic characteristics, while  $\delta_t$  are weekly fixed effects that adjust for nationwide secular trends in the outcome.  $\mathbf{u}_{imt}$  is a vector of residuals. Standard errors are clustered at the state and week-level.

We then computed estimates of the survival  $\Pr [C_{t+1} = 0 | D \cdot T = d \cdot t, \mathbf{X} = x, \mathbf{M} = m, S = s]$  by multiplying the estimates of one minus the estimates of  $\Pr [C_{t+1} = 1 | C_t = 0, D \cdot T = d \cdot t, \mathbf{X} = x, \mathbf{M} = m, S = s]$  provided by the logistic model for each individual-week. We computed two opposing counterfactual scenarios: one where every state that implemented an eviction moratorium maintained it throughout the study period, and another where every state that implemented an eviction moratorium lifted it on week 17. We chose week 17 because it was the first week a state lifted its eviction moratorium (Table 1).

We built a 95% confidence interval for the survival estimates one week before the CDC issued their eviction moratorium via bootstrapping our complete analytic sample. Given the large dataset, we conducted 50 replications for each counterfactual.

### **eReferences.**

21. Kline P. The Impact of Juvenile Curfew Laws on Arrests of Youth and Adults. *American Law and Economics Review*. 2012;14(1):44-67. doi:[10.1093/aler/ahr011](https://doi.org/10.1093/aler/ahr011)
